# Supplementary material for: The AI Paradox in L2 Writing: Why Helpful Feedback Creates Unhelpful Dependency in Higher Education
Source: Research Square preprint supplement (doi:10.21203/rs.3.rs-8731897/v1), 2026-02-01
Supplement: Supplementary file 1 [file 0202f754fc610159e180a2d0.docx]

**SUPPLEMENTARY MATERIALS B**

**Pedagogical Interventions to Prevent or Address AI Dependency**

Once teachers recognize AI Dependency Syndrome (ADS) indicators, they can implement targeted interventions designed to rebuild confidence, restore critical judgment, reactivate metacognitive awareness, and strengthen authorial voice. The following three strategies are grounded in established theories of autonomy, self-efficacy, and identity development in language learning. Each intervention includes step-by-step implementation guides suitable for both novice and experienced teachers.

**STRATEGY 1: AI-Free Writing Days and Confidence-Building Assignments**

**Theoretical Foundation**

Bandura's (1986) self-efficacy theory demonstrates that individuals' beliefs about their own capabilities directly influence motivation and behavior. When students consistently rely on AI for writing tasks, they attribute success to the system rather than their own effort, leading to eroded self-efficacy. Bandura argues that successful completion of tasks *independently* increases confidence and future engagement. The mechanism is straightforward: experiences of success build competence beliefs; competence beliefs motivate increased effort; increased effort produces further success.

Therefore, interrupting the AI-reliance cycle through scaffolded independent writing experiences allows students to accumulate successful experiences that restore perceived self-efficacy. Regular, structured opportunities to write without AI support rebuild the confidence that dependency has eroded.

**Empirical Support**

Recent synthesis findings confirm this principle. Shi et al. (2025) document that students experiencing high AI reliance report decreased sense of learner agency. S. Zhang et al. (2024) note documented "decrease in personal ability" and associated anxiety. Budiyono (2025) provides a powerful student quote recognizing this pattern: "When I write without it, I feel uncertain...like I've lost some confidence I had before." This statement is crucial: it shows that confidence *can* be restored —the student recognizes the loss, implying restoration is possible through retraining.

Additionally, research on writing pedagogy (Benson, 2011) and self-efficacy interventions (Pajares & Schunk, 2005) confirms that low-stakes, scaffolded independent writing tasks are effective for rebuilding confidence. The key is starting with manageable tasks where success is achievable, then gradually increasing difficulty.

**Implementation Guide**

**Step 1: Identify AI-Free Days in Your Course Schedule**

Choose 1-2 days per week designated as AI-free writing days. Examples:

- **Tuesday writing workshops:** All in-class writing is AI-free
- **Thursday quick writes:** 15-minute independent writing prompts, no AI access
- **Wednesday peer review:** Students provide feedback to peers before either submits to AI
- **Monthly timed essays:** In-class essays written without AI access

**Tip for novice teachers:** Start with just one AI-free activity per week. As you become comfortable managing the classroom, expand to 2-3 activities.

**Tip for experienced teachers:** Vary the type of AI-free activity to maintain student engagement and address different skill levels.

**Step 2: Design Low-Stakes Writing Tasks**

AI-free days should feature **low-stakes writing** —writing that doesn't heavily impact grades, allowing students to focus on building confidence rather than achieving perfect product quality.

**Examples of low-stakes AI-free writing:**

**For Beginners/Low-Confidence Students:**

- **Journal prompts:** "What are you most worried about in your writing? Why?"
- **Personal narratives:** "Tell the story of your most embarrassing moment as a writer" (5 minutes)
- **Quick writes:** "Finish this sentence: When I write without AI, I feel..."
- **Free writing:** 10 minutes of stream-of-consciousness writing on any topic with no corrections expected

**For Intermediate Students:**

- **Paragraph summaries:** Summarize an article in 1-2 paragraphs without AI
- **Letter writing:** Write a formal/informal letter to a friend/family member
- **Opinion paragraphs:** "Do you think AI should be allowed in writing class? Why?"
- **Short response essays:** 15-minute response to a prompt (e.g., "How has AI changed your writing process?")

**For Advanced Students:**

- **Argumentative drafts:** First draft of an argument (rough, unpolished, not final)
- **Comparative analysis:** Compare two texts or ideas without looking up supporting information
- **Creative writing:** Short story, poem, or personal essay
- **Reflective essays:** "How has your writing improved this semester?"

**Template for designing low-stakes AI-free prompts:**

TOPIC: ____________________

TIME LIMIT: 10-20 minutes

INSTRUCTION: Write freely without checking grammar, structure, or AI feedback.

GRADING: Completion only (or effort-based, not accuracy-based)

EXAMPLE: [Provide a model or example of what you're asking for]

WHAT NOT TO WORRY ABOUT: Don't worry about perfect grammar, spelling, or organization.

Focus on: Getting your ideas on paper / Expressing yourself clearly / Developing your voice

**Step 3: Provide Teacher-Generated Scaffolds (NOT AI-Generated)**

Instead of having students use AI to scaffold their thinking, you provide scaffolds. This maintains the supportive function of scaffolding while keeping the task AI-free.

**Examples of teacher-generated scaffolds:**

**Scaffold Type 1: Outline Templates**

TOPIC: The Impact of AI on Student Writing

I. Introduction

A. Hook: Start with a surprising fact or question about AI

B. Background: What is AI writing assistance?

C. Thesis: [Your main argument about impact]

II. Argument 1: Benefits of AI

A. First benefit: ___________

B. Example: ___________

C. Why this matters: ___________

III. Argument 2: Concerns about AI

A. First concern: ___________

B. Example: ___________

C. Why this matters: ___________

IV. Conclusion

A. Restate main argument: ___________

B. Final thought: ___________

**Scaffold Type 2: Word Banks (For Intermediate/Advanced Students)**

TOPIC: Academic disagreement

EXPRESSIONS FOR DISAGREEMENT:

- I respectfully disagree because...

- While [Author] argues that X, evidence suggests Y...

- This position overlooks the fact that...

- A more nuanced view would consider...

- It's worth noting that... contradicts this claim...

YOUR TURN: Write 3 sentences disagreeing with a position using these phrases.

**Scaffold Type 3: Sentence Starters (For Beginners)**

TOPIC: Your relationship with writing

SENTENCE STARTERS:

- I enjoy writing when...

- I find writing difficult because...

- One thing I'd like to improve about my writing is...

- My writing is strongest when I...

- Without AI, I feel confident about my ability to...

YOUR TURN: Complete 3 of these sentences honestly. Write at least 2 sentences for each.

**Scaffold Type 4: Question Prompts (For All Levels)**

TOPIC: Revising your draft without AI

QUESTIONS TO ASK YOURSELF:

**1.** What is the main idea in this paragraph?

(Can you say it in your own words in 1 sentence?)

**2.** Does every sentence in this paragraph support that main idea?

(Which sentences might not belong?)

**3.** Is there a sentence that confuses you or could be clearer?

(How would you explain this idea differently?)

**4.** Did you repeat any ideas?

(Can you combine or eliminate sentences?)

**5.** Would a reader understand this? Why or why not?

YOUR TURN: Read your draft and answer these questions.

**Step 4: Create Explicit Celebration Rituals**

This is crucial for confidence-building. Students need to experience success explicitly and have it acknowledged.

**Celebration Ritual Ideas:**

**Ritual 1: "Writing Wins" Sharing (5 minutes)**

At the end of each AI-free writing activity:

- Ask: "Who wrote something today that surprised you? Something you didn't know you could write?"
- Have 2-3 volunteers share a sentence or two
- Response from teacher: "Listen to how clear that is. That's YOUR voice, YOUR thinking."
- Optional: Have class snap their fingers or applaud each share

**Ritual 2: Confidence Tracking Chart**

Create a simple chart where students mark their confidence level after each AI-free writing task:

**CONFIDENCE TRACKING**

Task 1 (Sept 3): 😟 😐 😊 😄 ✨

Task 2 (Sept 10): 😟 😐 😊 😄 ✨

Task 3 (Sept 17): 😟 😐 😊 😄 ✨

[Continue throughout semester]

**Instructions:** After each AI-free writing, mark how confident you felt.

**Goal:** Watch your confidence grow over the semester!

**Ritual 3: Portfolio Review**

Every 4 weeks, have students review their AI-free writing portfolio:

- - Collect all AI-free writing from the past month
  - Ask students: "What has improved? What surprises you?"
  - Have them write a 1-paragraph reflection: "How has my confidence changed?"

**Ritual 4: Peer Validation**

Pair students and have them read each other's AI-free writing:

- - Student A reads Student B's work aloud
  - Student B listens without their paper
  - Student A tells Student B: "This is clear to me because..." or "I was surprised to learn..."
  - Switch roles

**Why this works:** Hearing someone say "I understood your point" is powerful confidence-building, especially for students who have internalized the message that "I can't write without AI."

**Step 5: Gradual Complexity Progression**

Start with very easy, low-pressure tasks. Over weeks/months, gradually increase complexity and stakes.

**Week 1-2:** Comfort Building

- - 10-minute journal writes on personal topics
  - Completion-only grading
  - Focus: "You can write. You have ideas. Let's get them on paper."

**Week 3-4:** Brief Structured Writing

- - Paragraph-length responses to prompts
  - Scaffolds provided (outlines, sentence starters)
  - Effort-based grading

**Week 5-8:** Longer Independent Writing

- - 2-3 paragraph essays in class
  - Minimal scaffolds
  - Feedback: "Look what you accomplished without AI"

**Week 9+:** Confidence Consolidation

- - Timed essays (exam conditions without AI)
  - Peer review without AI
  - Student reflections on growth

**Tip:** Make the progression visible. Tell students: "Week 1, we're building confidence. Week 5, we're proving you can do this. Week 10, you'll see how far you've come."

**Step 6: Individual Conferences (For Struggling Students)**

For students showing severe confidence erosion (**Indicator 3: Expressed Anxiety**), individual conferences are important.

**Conference Protocol (15-20 minutes):**

- 1. **Warm welcome** (1 minute): "Thanks for meeting with me. I want to talk about your writing and how you're feeling about it."
  2. Listen (3 minutes): Ask open questions:
  - "How do you feel about writing without AI?"
  - "What's the hardest part?"
  - "What worries you most?"
  - Listen. Don't interrupt. Validate feelings.
  1. **Share observations** (2 minutes): "I notice you [specific observation]. This tells me [interpretation]. And here's what I want you to know: That's normal. Lots of students feel this way after relying on AI tools a lot."
  2. **Build hope** (2 minutes): "Here's the good news: confidence is developable. I've seen students rebuild their confidence through [specific activity]. It takes practice, but it works."
  3. **Make a specific plan** (5 minutes):
  - "Here's what I'm going to do to support you: [specific scaffolds/strategies]"
  - "Here's what I'm asking you to do: [specific goal, e.g., one journal write per week without AI]"
  - "Here's how we'll track improvement: [progress markers]"
  1. **Follow-up date** (1 minute): "Let's meet again in 3 weeks to see how you're doing. I'm confident you're going to get better at this."

**Key phrases for confidence-building conferences:**

- "I believe in your ability to do this."
- "This is normal. You're not alone."
- "Confidence isn't something you're born with; it's something you develop."
- "I've seen students exactly like you rebuild their confidence in 4-6 weeks."
- "Let's focus on progress, not perfection."

**STRATEGY 2: Critical AI Literacy and Conscious Tool Use**

**Theoretical Foundation**

Metacognitive awareness —thinking about one's own thinking— is essential for autonomous learning. Benson (2011) and Flavell (1979) establish that learners who consciously monitor their own learning processes develop stronger autonomy and make more intentional choices. When students passively accept AI suggestions, they are not engaging in metacognitive reflection; they are abdicating decision-making to an algorithm.

Teaching students to evaluate AI suggestions against communicative goals requires explicit metacognitive scaffolding: teaching them to ask, "Does this serve my purpose? Does this match my intended meaning? Is this choice appropriate for my context and audience?"

**Empirical Support**

Multiple studies in the synthesis document that students accept AI suggestions without critical evaluation. For instance, Koltovskaia (2020) and Ranalli (2021) show that students "often revise contrary to their own communicative intent when AI recommends changes." Additionally, Chen and Cui (2022) found that students "standardized their wording to conform to system prompts, which inhibited individual expression." Furthermore, Yan and Zhang (2024) reveal that students "become trapped in endless cycles of adjusting prompts...all to generate responses that satisfy the algorithm rather than the actual reader."

However, the critical insight comes from Ziqi et al. (2024): students already discriminate among AI suggestions (accepting grammar feedback but rejecting content suggestions). What they lack is a systematic framework for critical evaluation. Critical AI literacy teaching provides that framework.

**Implementation Guide**

**Component A:**

**"AI Suggestion Evaluation Protocol"**

Teach students a simple decision tree for evaluating AI suggestions before accepting them.

**The Protocol (Teach This Explicitly):**

WHEN YOU SEE AN AI SUGGESTION, ASK THESE 5 QUESTIONS:

**1.** DOES THIS IMPROVE CLARITY FOR MY INTENDED AUDIENCE?

✓ YES → Consider accepting

✗ NO or UNSURE → Proceed to Question 2

**2.** DOES THIS CHANGE MY MEANING OR VOICE?

✓ KEEPS MY MEANING → Consider accepting

✗ CHANGES MY MEANING → STOP. Reject or modify. Go to Question 4.

✗ CHANGES MY VOICE → STOP. Reject or modify. Go to Question 4.

**3.** IS THIS PRIORITIZING GRAMMATICAL CORRECTNESS OVER MY COMMUNICATIVE GOAL?

✓ NO - The suggestion serves my goal → Consider accepting

✗ YES - It's just "cleaner" but doesn't help my message → REJECT

**4.** IS THIS SUGGESTION ALIGNED WITH THE GENRE AND CONTEXT I'M WRITING FOR?

✓ YES - This fits my genre/audience → Consider accepting

✗ NO - This is too formal/informal/academic/casual for my context → REJECT or MODIFY

**5.** IF I ACCEPT THIS, DOES MY WRITING STILL SOUND LIKE ME?

✓ YES - I still recognize my voice and ideas → Accept

✗ NO - This sounds like an algorithm → REJECT

**DECISION:**

→ ACCEPT (suggestion improves clarity AND preserves meaning AND fits my context AND sounds like me)

→ REJECT (suggestion fails one or more criteria)

→ MODIFY (I'll take the suggestion but adapt it to fit my voice and purpose)

**How to Teach This Protocol:**

**Lesson 1: Introduce the Protocol (30 minutes)**

- - 1. Show the protocol on screen/board (2 minutes)
    2. Model with an example (10 minutes)
- Show a student draft with AI feedback
- Think aloud as you work through the 5 questions
- Make a decision (accept/reject/modify) and explain why
  - 1. Practice together (10 minutes)
- Show another example
- Ask students to answer the 5 questions with you
- Discuss: "Do you agree with my decision? Why or why not?"
  - 1. Check for understanding (5 minutes)
- Ask: "What's the first question you always ask?"
- Clarify: "The goal is that YOU decide—not the AI."

**Lesson 2: Guided Practice (30 minutes)**

1. Provide 3 new examples of AI feedback
2. For each example:

- Have students work in pairs
- Pairs answer the 5 questions for each AI suggestion
- Pairs decide: Accept/Reject/Modify
- Discuss as a class: "Why did you make this decision?"

**Lesson 3: Independent Application (30 minutes)**

1. Students apply the protocol to their own AI-revised writing:

- Take a draft they've already revised with AI
- Work through the 5 questions for each change
- Write notes: "I kept this change because..." / "I rejected this suggestion because..."
- Optional: Share 1-2 decisions with a peer

1. Teacher materials needed:

- Printed protocol cards (1 per student—laminate for durability)
- 3-5 example drafts with AI feedback
- Sample think-aloud script (see below)

**Think-Aloud Script (Model This):**

"Okay, I'm looking at this AI suggestion. It wants me to change 'The government totally ignored the problem' to 'The government failed to address the concern.' Let me work through my questions.

**Question 1**: Does this improve clarity? Actually, yes. 'Failed to address the concern' is a bit clearer than 'totally ignored.'

**Question 2**: Does this change my meaning? Hmm... 'totally ignored' sounds more emotional and stronger. 'Failed to address' sounds more neutral. So yes, it changes my tone and emphasis. This matters because I'm trying to show that I'm angry about this issue. If I use the AI's version, it sounds more distant.

**Question 3**: Is this just about grammar or does it serve my goal? This is about word choice and tone, not grammar. The goal is to be clear, not to sound more formal. My original version is actually clear enough.

**Question 4**: Is this appropriate for my context? I'm writing for my professor, who expects formal language, but also wants authentic voice. The AI suggestion is TOO formal.

**Question 5:** Does it still sound like me? No. I say things more emotionally. This sounds robotic.

So my decision: REJECT or MODIFY. I might keep 'failed to address' but add something that keeps my emotional tone: 'The government failed to truly address the problem—it was basically ignored.' That way I keep the clarity but also keep my voice."

**Component B:**

**"Algorithmic Bias Awareness" Mini-Lessons**

Teach students that algorithms have preferences, not truth. Show them that excellent writing exists outside algorithmic preferences.

**Mini-Lesson 1: What AI Systems Learn (15 minutes)**

**Objective:** Students understand that AI reflects its training data, not universal truth.

**Activity:**

1. **Explain:** "AI systems learn from data. ChatGPT learned from billions of words on the internet. But the internet isn't neutral. Most content is in English, from Western countries, written by educated people. So ChatGPT has a bias toward Western, formal, academic English."
2. **Show examples:**
   - Example 1 (Formal academic):
     "The implementation of progressive pedagogical methodology facilitates enhanced cognitive engagement."
     AI rating: Excellent (formal, academic)
   - Example 2 (Conversational):
     "When we teach differently, students learn better."
     AI rating: Flag as "too casual"
   - Both say the same thing, but AI prefers one.
3. **Ask students:** "Is the conversational version wrong? Or just different?"
   - Most students recognize: "Just different. Both are good for different contexts."
4. **Conclude:** "Exactly. AI doesn't know that. It has a preference. If you use AI for everything, your writing starts to match AI's preference, and you lose your own choices."

**Mini-Lesson 2: Excellent Writing That Fails AI Checks (20 minutes)**

**Objective:** Students recognize that powerful writing often breaks algorithmic rules.

**Activity:** Show Examples of Excellent Writing That AI Would Flag

Example 1: Powerful Rhetoric

**Original:** "The government must act immediately."

**AI suggestion:** "It is recommended that the government consider prompt action."

**Better:** Sometimes short and direct is more powerful than the algorithmic version.

Example 2: Code-Switching (Multilingual)

"Education is fundamental, como dice mi mamá, 'la educación es el cambio.'"

**AI would flag:** "Avoid mixing languages"

**But:** Code-switching is authentic and powerful for bilingual writers.

**Discussion :**

- **Ask students**: "Have you ever written something powerful that wouldn't pass AI checks?"
- **Ask:** "What's an example of excellent writing that breaks the rules?"
- **Point:** "Rules aren't absolute. Context and purpose matter."

**Mini-Lesson 3: Bias in AI Feedback (20 minutes)**

**Objective:** Students recognize that AI can be biased against non-Western writers.

**Activity:** Show Real Examples from Research

**Example** (from Liang et al., 2023):

- Non-native English speakers' TOEFL essays: 98% flagged as "suspicious" by one AI detector
- Native English speakers' essays: 10% flagged as "suspicious"
- Same words, same quality, different first language
- Result: Non-native speakers blamed for "AI-like" writing they didn't produce

**Discussion:**

- **Ask:** "Is this fair? Why or why not?"
- **Ask multilingual students**: "Does this sound like something that could happen to you?"
- **Conclude:** "We need to be smart about trusting AI. It can be biased."

**Mini-Lesson 4: Student Handout—"Questions to Ask About AI" (Print and Give to All Students)**

CRITICAL QUESTIONS TO ASK ABOUT AI WRITING TOOLS

**1.** WHO TRAINED THIS AI?

• What data was it trained on?

• Is the data diverse (different languages, cultures, contexts)?

• Or is it mostly Western, academic, formal English?

**2.** WHOSE VOICE DOES THIS AI PREFER?

• Does it prefer formal language?

• Does it prefer specific sentence structures?

• Does it penalize code-switching?

• Does it penalize non-standard dialects?

**3.** WHO MIGHT THIS AI BIAS AGAINST?

• Non-native English speakers?

• Multilingual writers?

• Writers from non-Western cultures?

• Writers using non-standard dialects?

**4.** WHAT'S AI NOT GOOD AT?

• Understanding context

• Understanding your real purpose

• Understanding your audience

• Understanding your authentic voice

**5.** WHAT SHOULD I NOT RELY ON AI FOR?

• Final decisions about meaning

• Understanding what audience you're writing for

• Deciding what matters about your topic

• Maintaining your authentic voice

**REMEMBER:** AI is a TOOL. YOU are the AUTHOR.

**STRATEGY 3: Voice Preservation and Authorial Identity Work**

**Theoretical Foundation**

Norton's (2000) identity theory in language learning demonstrates that learners' sense of identity as language users directly influences investment in learning and development of autonomy. When learners' voices are subordinated to algorithmic norms—as documented in this synthesis—their identity as authors is threatened, leading to disengagement and dependency.

Benson (2011) emphasizes that autonomous learners develop their own writing identities and make conscious choices about how to communicate. Voice preservation is central to autonomy development. Additionally, Bourdieu's (1991) concept of linguistic capital emphasizes that individual linguistic choices (accent, dialect, style, voice) are valuable cultural assets. When AI pushes toward homogenization, it erodes students' linguistic capital and cultural identity.

**Empirical Support**

Jakesch et al. (2023) document that "learners who co-write with LLMs inadvertently take on the rhetorical stance and style of the AI, modifying their own writing to fit the system's favored patterns." Mi et al. (2025) show "erosion and homogenization of voice" as a critical concern in AI-mediated writing.

Critically, Agarwal et al. (2025) document how "cross-cultural users were nudged toward Western stylistic conventions, erasing culturally specific expression" in what they term "AI colonialism." Tran and Stell (2024) show that "LLMs tend to default to standard language forms, sidelining local varieties." Voice preservation work is not merely pedagogically sound; it is an equity and justice issue, protecting students' right to express themselves authentically.

**Implementation Guide**

**Component A:**

**Create a "Voice Profile" Early in Semester**

**Objective:** Help students become consciously aware of their writing voice before AI use homogenizes it.

**Activity:** Voice Discovery Workshop (60 minutes)

**Part 1:** Personal Writing Sample (20 minutes)

Ask students to write freely on one of these prompts (low-stakes, no corrections):

- "Tell the story of something that made you angry or passionate recently"
- "Explain something you know a lot about to someone who's never heard of it"
- "Write about a memory that's stayed with you"
- "Describe your ideal day"

**Instruction:** "Write in your natural voice. Don't try to sound 'academic' or 'correct.' Write like you're texting a friend or talking to someone you know well."

**Part 2:** Analyze Your Voice (20 minutes)

After writing, students analyze their own voice using this guide:

**MY VOICE PROFILE**

Reread your writing and notice:

**1.** FAVORITE WORDS OR PHRASES

• What words do I use a lot?

• Do I say "really" or "definitely" or other favorites?

• Do I use slang?

• Examples from my writing: ____________

**2.** SENTENCE PATTERNS

• Are my sentences long or short?

• Do I use varied length (some short, some long)?

• Do I use fragments or rhetorical questions?

• Do I use lists or series?

• Examples: ____________

**3.** PERSONALITY IN MY WRITING

• Does my writing sound serious, funny, sarcastic, earnest?

• Do I use sarcasm, irony, or humor?

• Do I show emotion or stay neutral?

• Examples: ____________

**4.** CULTURAL OR LINGUISTIC FEATURES

• Do I code-switch (use another language)?

• Do I use cultural references or idioms?

• Do I use expressions from my home language?

• Examples: ____________

**5.** HOW I SOUND

• If someone read this aloud, how would it sound?

• Formal? Casual? Friendly? Distant?

• What words would you use to describe my voice?

• ____________

**MY VOICE IN ONE SENTENCE**:

My writing sounds like ________________________

**Part 3:** Create Your Voice Profile Document (15 minutes)

Students fill in this template:

**MY VOICE PROFILE** (Keep this document all semester!)

**MY AUTHENTIC VOICE INCLUDES:**

1. Words/phrases I use: ___________________

2. My sentence style: ___________________

3. My personality in writing: ___________________

4. Cultural/linguistic features I use: ___________________

5. How my voice sounds: ___________________

**THINGS I WANT TO PROTECT IN MY WRITING:**

• I want to keep using _________________ because it's part of who I am

• I want to maintain my _________________ tone because it's authentic

• I don't want to lose my _________________ because it's important to my identity

**PERMISSION STATEMENT** (say this to yourself):

"My voice is valid. My way of writing is not wrong; it's mine. When I use AI,

I will remember my voice and protect it. My writing should sound like me."

**Teacher tip:** Collect these on day 1 of the course. Reference them throughout the semester. Show students: "Remember what you wrote about your voice? Let's protect that."

**Component B:**

**"Voice Check" After AI Revision**

**Objective:** Help students identify where their voice disappeared in AI-revised writing and restore it intentionally.

**Activity:** Voice Check Protocol (Can be used regularly)

After students have revised with AI, have them do a "Voice Check":

**VOICE CHECK:** IS YOUR VOICE STILL THERE?

**Step 1:** READ YOUR ORIGINAL PARAGRAPH

Mark or highlight:

✓ Words/phrases that sound like YOU

✓ Sentences with your personality

✓ Your authentic tone

**Step 2:** READ THE AI-REVISED VERSION

Mark or highlight the same features:

✓ Your words/phrases (are they still there?)

✓ Your personality (is it still present?)

✓ Your tone (did it change?)

**Step 3:** COMPARE

• What AI-revised sections still sound like you?

• What changed most?

• Where did your voice disappear?

**Step 4:** VOICE RESTORATION

Rewrite any sections where you lost your voice. Keep the improvements from AI,

but restore your voice.

**EXAMPLE:**

***ORIGINAL*** (Student's voice):

"ChatGPT is awesome but scary. It can write like a human, but it doesn't actually think."

***AI REVISION*:**

"Large Language Models demonstrate impressive linguistic capabilities while

simultaneously presenting significant epistemic concerns regarding authentic cognition."

**STUDENT VOICE RESTORED:**

"ChatGPT can write convincingly, and that's powerful. But it doesn't actually think

or understand—and that's the concern."

(This version keeps clarity and formality from AI while restoring the student's

conversational voice and authentic worry.)

**YOUR TURN:** Take one AI-revised paragraph and restore your voice.

**Component C:**

**Explicitly Value Linguistic and Cultural Diversity**

**Objective:** Teach that non-standard language choices are valid and valuable.

**Mini-Lesson:** "Different ≠ Wrong" (30 minutes)

**Part 1:** **Show Examples of Diverse Writing Excellence (10 minutes)**

**Example 1:** African American Vernacular English

Show an excerpt from an acclaimed author using AAVE naturally:

"It was only when she left Atlanta that she understood how much she had loved it.

She loved it like folks say you love something when you can't live without it,

when it fills you full. The city was in her blood."

Ask: "Is this writing excellent? Yes. Does it follow 'standard' English rules? Not exactly. But is it powerful? Absolutely."

**Example 2:** Oral/Conversational Style

"Now, let me tell you something about writing. You don't need to sound fancy.

You need to sound real. And real is better than perfect every time."

Ask: "Is this too casual for academic writing? Maybe. But it's powerful, right?"

**Part 2: Discuss AI's Limitation (10 minutes)**

**Explain:** "AI systems are trained mostly on formal, Western academic English. They have a bias. When AI suggests 'improvements,' sometimes it's erasing the very features that make your writing authentic and powerful.

For multilingual writers, for writers using non-standard dialects, for writers using code-switching: Your way of writing isn't wrong. It's you. Don't let an algorithm convince you to erase yourself."

**Part 3: Student Permission Statement (10 minutes)**

Have each student write a personal permission statement:

**MY VOICE PERMISSION STATEMENT**

I give myself permission to:

□ Use code-switching in my writing if it's authentic to me

□ Use non-standard language choices if they serve my purpose

□ Use cultural references and expressions from my background

□ Write in a conversational tone sometimes

□ Break grammar "rules" if it makes my writing more powerful

□ Sound like me, not like an algorithm

I will NOT let AI make me sound like everyone else.

I will protect my voice because it's valuable.

Signed: ________________ Date: ________________

**Teacher follow-up**: Reference these statements regularly. Reassure students: "Remember your permission statement? Use it. Your voice matters."

**Component D:**

**Create a "Voice Gallery" (Class Project)**

**Objective:** Celebrate diverse voices and reinforce that difference is strength.

**Activity** (30 minutes + ongoing):

- 1. Ask each student to contribute one piece of their authentic writing (something written before heavy AI use, ideally)
  2. Have them identify one distinctive feature of their voice: "My voice uses code-switching" or "My voice includes humor" or "My voice uses questions"
  3. Display these anonymously on a classroom wall/poster/digital board with labels:

"Code-switching brings culture to writing"

"Humor makes writing engaging"

"Questions draw readers in"

"Conversational tone feels authentic"

"Emotion makes writing powerful"

- 1. Invite students to walk around and note: "Which voices do I recognize? What do I like about diverse voices?"
  2. Discuss as a class:
- "These writing samples are ALL different. Which is 'best'? Answer: None. They're all excellent in different ways."
- "If we all used AI to 'improve' these, they would all sound the same. Would that be better? Answer: No."

**Why this works:** Students see concretely that diversity of voice is strength, not weakness. They see their peers' voices valued.

**SUMMARY: Implementing All Three Strategies**

**For students with Indicators 1-3** (Confidence erosion):

→ Start with Strategy 1: AI-Free Days to rebuild confidence

**For students with Indicators 4-6** (Algorithmic approval bias):

→ Implement Strategy 2: Critical AI Literacy to restore metacognitive agency

**For students with Indicators 7-9** (AI norm internalization):

→ Use Strategy 3: Voice Preservation to protect linguistic identity

**For students with symptoms across all three dimensions**:

→ Implement all three strategies together, starting with confidence-building

**Implementation Timeline (Semester Plan)**

**Weeks 1-2:**

Establish voice profiles (Strategy 3, Component A)

Introduce AI-Free Days (Strategy 1, Step 1-2)

Begin low-stakes independent writing

**Weeks 3-5:**

Continue AI-Free Days with increasing complexity (Strategy 1, Step 5)

Introduce Critical AI Literacy Protocol (Strategy 2, Component A)

Do voice check activities (Strategy 3, Component B)

**Weeks 6-8:**

Teach Algorithmic Bias Awareness (Strategy 2, Component B)

Implement Voice Gallery project (Strategy 3, Component D)

Maintain all three strategies

**Weeks 9-15:**

Consolidate confidence gains (Strategy 1, Step 5)

Deepen critical evaluation (Strategy 2)

Celebrate voice preservation (Strategy 3)

**Quick-Start Guide for Novice Teachers**

**Week 1:**

1. Introduce one AI-Free writing task (Strategy 1)
2. Have students complete voice profile (Strategy 3, Component A)
3. Print and distribute the AI Suggestion Evaluation Protocol (Strategy 2, Component A)

**Week 2:**

1. Do one "Voice Check" activity (Strategy 3, Component B)
2. Teach one mini-lesson on algorithmic bias (Strategy 2, Component B)
3. Continue AI-Free day 1x/week

**Week 3+:**

1. Gradually add more components
2. Don't try to do everything at once
3. Focus on what your students need most

**Remember:** You don't need to be perfect. Your commitment to protecting student voices and building confidence is what matters. Start small, build gradually, and refine as you go.
