# Supplementary material for: The AI Paradox in L2 Writing: Why Helpful Feedback Creates Unhelpful Dependency in Higher Education
Source: Research Square preprint supplement (doi:10.21203/rs.3.rs-8731897/v1), 2026-02-01
Supplement: Supplementary file 2 [file dbf7c8ee1f39fa3939c165bb.docx]

**SUPPLEMENTARY MATERIALS A**

**Recognizing AI Dependency in the Classroom: Practical Identification Strategies**

Language educators can use the nine diagnostic indicators of AI Dependency Syndrome (ADS) to recognize when student reliance on AI transitions from supportive scaffolding to problematic dependency. The following examples illustrate how each indicator manifests in real classroom contexts and how teachers can identify them through observation and student communication.

1. **Loss of Confidence in Unaided Production—Three Observable Patterns**

**Indicator 1: Avoidance of Unaided Drafting**

**Recognition:** Students exhibit persistent hesitation to begin or complete writing tasks without AI assistance.

**Classroom Manifestation:**

Students delay starting assignments until they have access to AI tools. Characteristic statements include: "Can I use ChatGPT for this?" When asked to write without AI, they exhibit visible anxiety: "I cannot write without Grammarly/ChatGPT anymore. I do not know how to start without it checking my grammar as I go." They consistently wait for AI availability rather than beginning independently. In interviews or one-on-one conversations, they report: "I have lost confidence in my own writing" or "I do not trust my English anymore without the checker." Some of them explicitly state: "I need Grammarly/ChatGPT to make sure my writing is okay."

When a classroom activity requires independent writing (e.g., a timed in-class essay without AI access), these students show visible distress: hesitation, repeated false starts, erasing work frequently, or requesting extended time despite having adequate time. They may attempt to write, then delete everything and ask to postpone until they can use AI tools.

**What This Signals:**

Loss of confidence in unaided production is beginning; the student is attributing writing success to the system rather than his own abilities. This pattern is documented in recent LLM studies where excessive reliance correlates with a decreased self-efficacy belief. For instance, Shi et al. (2025) found that students experiencing high AI reliance report decreased sense of learner agency. In a similar vein, Zhang et al. (2024) documented a decrease in personal ability alongside increased learned helplessness. Budiyono (2025) captured this explicitly: "When I write without it, I feel uncertain about my grammar...like I've lost some confidence I had before" (p. 1009).

From a theoretical perspective, Bandura's (1986) self-efficacy theory explains this mechanism: when learners attribute positive outcomes to external systems rather than their own effort, perceived self-efficacy declines. This triggers a self-perpetuating cycle where reduced confidence increases reliance on external support, which further erodes independent confidence.

**Teacher Action :**

1. Document which students consistently avoid independent drafting
2. Note when this pattern began (recent AI adoption or long-standing hesitation?)
3. Observe whether students express anxiety or avoidance statements
4. During individual meetings, ask: "How do you feel about writing without Grammarly/ChatGPT?"
5. Track frequency: Does this happen occasionally or every time independent writing is required?

This is the first warning sign of emerging dependency. Early intervention (see Supplementary Materials B) can prevent escalation to deeper dependency patterns.

**Indicator 2: Inability to Self-Edit Proactively**

**Recognition:** Students defer all revision until AI feedback is provided; they cannot identify or correct errors independently.

**Classroom Manifestation**:

Students submit first drafts without any independent revision. When asked why they made no changes, they respond: "I did not change anything because I wanted to see what ChatGPT would say first." When asked "Do you notice any grammar issues in this paragraph?", they express genuine uncertainty and want to consult AI first: "I am not sure. Let me check with Grammarly." They cannot explain why a sentence is awkward or unclear without checking with an automated system.

All editing happens *after* AI feedback, never before. Learners describe their revision process as: "I write, then run it through ChatGPT, then use the suggestions." When a teacher asks them to self-edit before receiving AI feedback, they report difficulty: "I do not know what to look for" or "I will just miss the errors anyway, so why try?" Some of them explicitly avoid re-reading their own work, and jump directly to AI tools.

In peer review activities, these students struggle to provide feedback to classmates because they have lost the ability to evaluate writing quality independently. They defer to: "I do not know if this is good. Let me see what ChatGPT says."

**What This Signals:**

Metacognitive erosion has occurred. Students have outsourced their ability to reflect on and improve their own writing. According to Flavell (1979) and Schön (2017), metacognitive awareness, conscious reflection on one's own thinking and writing processes, is essential for autonomous learning. So, when students skip this step, they lose the opportunity to develop this critical skill.

This pattern was identified even in pre-LLM contexts with Automated Writing Evaluation systems. For example, Ranalli (2021) found that students often defer self-editing until receiving algorithmic feedback. The emergence of LLMs has intensified this pattern because generative systems can suggest entire sentences and paragraphs, not just identify errors. As a result, learers no longer need to generate their own revisions; they can simply accept AI-generated alternatives.

**Teacher Action :**

1. Assign independent revision time *before* his students access AI tools
2. Ask them to self-edit and highlight changes they made
3. During meetings, ask: "What revision decisions did you make yourself?" and "How did you know that was an error?"
4. Observe whether they attempt any corrections independently or immediately defer to AI
5. Document the ratio: How many revisions are student-generated vs. AI-suggested?
6. Note if they can articulate *why* a sentence needs revision, or if they only know it needs revision because AI flagged it

**Indicator 3: Expressed Anxiety or Helplessness**

**Recognition:** Students explicitly report stress, self-doubt, or belief that unaided writing is futile.

**Classroom Manifestation:**

Direct statements in interviews, surveys, or informal conversations reveal anxiety. Students say: "When I write without ChatGPT, I feel uncertain about my grammar. I feel like I have lost some of the confidence I had before." These are not hypothetical statements; these are genuine expressions of distress about their writing ability.

They show visible stress during timed writing without AI access. Behavioral signs include: frustration, hesitation, repeated sighing, rushed work, or incomplete assignments. Some freeze and cannot start writing at all without algorithmic support available.

Statements indicating learned helplessness include: "I have become too dependent. I do not know how to fix my mistakes anymore" or "There is no point trying; the AI will do it better anyway." Some students express hopelessness: "I will never be good at writing without the tool" or "My English is just bad without Grammarly."

They may avoid writing tasks altogether if AI tools are unavailable: "Can we postpone this? I don't have access to ChatGPT right now." In extreme cases, they express that writing without AI is not worth attempting: "Why should I write it myself when AI can write it better?"

**What This Signals:**

Psychological dependency is active and distressing. Students experience genuine anxiety without AI support, indicating collapse in self-efficacy. This psychological state has cascading effects on motivation, engagement, and learning outcomes.

Bandura's (1986) self-efficacy theory explains this: individuals with low self-efficacy experience higher anxiety, avoid challenging tasks, and give up easily. When learners attribute success to external systems rather than their own effort, perceived competence declines and anxiety increases in the absence of that external support.

The cycle becomes: Low confidence **→** Avoid independent writing **→** Rely on AI **→** Success attributed to AI **→** Further confidence decline **→** Increased anxiety.

This is the psychological foundation that enables the cognitive and ideological dimensions of ADS to develop.

**Teacher Action :**

1. Create a safe, non-judgmental space for students to discuss anxiety about writing without AI
2. Validate their feelings: "It makes sense to feel uncertain after relying on these tools. That is normal and changeable."
3. Explicitly build confidence through scaffolded, independent writing practice (see Supplementary Materials B, Strategy 1: AI-Free Days)
4. Use growth mindset language: "These skills are developable. We can rebuild your confidence."
5. Track anxiety markers: Do students report decreasing anxiety as they engage in more independent writing?
6. Celebrate small wins: Acknowledge and praise independent writing successes, no matter how small

Early intervention at this stage is critical. The anxiety is real and must be addressed with empathy, not dismissal. However, it is also addressable through structured confidence-building activities.

1. **Algorithmic Approval Bias—Three Observable Patterns**

**Indicator 4: Prioritization of Error Elimination Over Communicative Intent**

**Recognition:** Students focus on resolving every AI-flagged issue, even minor/stylistic ones, at the expense of their own communicative intent.

**Classroom Manifestation:**

A student revises a sentence based on AI feedback even though the revision changes his intended meaning. Example: Original student text: "The government's refusal to act was, frankly, infuriating." AI feedback: "Informal word choice. Consider: 'The government's inaction was considerably concerning.'" Student revision: "The government's inaction was considerably concerning." When asked why they made this change, they reply: "The AI said my word choice was informal." They do not recognize that "infuriating" (emotional, personal, rhetorically powerful) is very different from "considerably concerning" (formal, distant, weaker). They prioritized grammatical conformity over communicative clarity.

Over-correction occurs systematically. A student intentionally uses informal language for audience rapport: "Hey, you might think AI is helpful, but there are real costs." AI flags the opening as "too casual for academic writing." They remove it, creating: "One might consider that although artificial intelligence offers certain benefits, there are significant associated costs." The revision is now formally correct but loses the rapport-building address and the authentic voice.

Revision choices become driven by AI rather than communicative goals. The learner states: "I am going to change this because the checker said so" rather than "I am going to change this because my audience will not understand this word" or "I need to clarify this for my reader."

So, the ultimate goal is prioritizing the achievement of "no red squiggles" or "100% Grammarly score" over communicative clarity. He considers his writing "finished" when algorithmic errors are eliminated, regardless of whether the message is clear to a human reader.

**What This Signals:**

The student has ceded authority over revision decisions to the algorithm. They no longer evaluate suggestions against communicative purpose (the stated goal of writing). Instead, they evaluate suggestions based on whether the algorithm approves.

Koltovskaia (2020) and Ranalli (2021) documented this pattern in pre-LLM contexts: Students often revise contrary to their own communicative intent when systems recommend changes. In the GenAI era, this pattern has intensified because AI suggestions are more sophisticated and harder to resist. Yan & Zhang (2024) show that learners become trapped in endless cycles of adjusting prompts...all to generate responses that satisfy the algorithm rather than the actual reader.

From Canale and Swain's (1980) communicative competence model perspective, this represents a profound reduction in competence. True competence requires attending to discourse (Does this fit together?), sociolinguistic (Is this appropriate for this context?), and strategic dimensions (Does this accomplish my communicative goal?), not just grammatical dimensions. When the student focuses solely on algorithmic approval, these higher-order dimensions collapse.

**Teacher Action :**

1. After students revise, ask them to justify each revision: "Why did you change this sentence?"
2. Listen carefully for the reasoning. If they say "Because AI suggested it," the pattern is present.
3. Follow up: "But does the change improve your message to your audience? Does it still mean what you wanted to say?"
4. Have them explain their communicative intent *before* revising with AI
5. Then compare: "Did your revision serve that intent? Or did it change your message?"
6. Track the language they use: Do they reference audience understanding or algorithmic approval?
7. Create a habit: "Before accepting any AI suggestion, ask yourself: Does this serve *MY* goal for *MY* reader?"

**Indicator 5: Uncritical Acceptance of AI Suggestions**

**Recognition:** Students routinely incorporate AI-proposed revisions without evaluating appropriateness, accuracy, or fit with intended message.

**Classroom Manifestation:**

Student accepts AI suggestions without reading them carefully. They state: "ChatGPT rewrote this paragraph and I just used it" (without reviewing, comparing, or evaluating). Copy-paste behavior is evident: direct replication of AI output with no adaptation or critical review. When asked why they made a particular revision, they cannot explain: "I do not know, the AI suggested it." The learner did not engage with the suggestion; they simply accepted it.

The pattern is quantitatively striking. In student writing, most of AI suggestions are accepted. Virtually no rejection or negotiation occurs. They rarely think: "I disagree with that suggestion" or "That does not fit my purpose." Every suggestion is taken as truth.

This is distinct from **Indicator 4**, which involves evaluating suggestions and choosing to prioritize algorithmic approval over communicative intent. **Indicator 5** is more passive: student is not even evaluating. They are simply accepting whatever AI generates.

Some students explicitly state: "I trust the AI more than I trust myself" or "The AI is always right, so why would I question it?"

**What This Signals:**

Critical judgment has been suspended. The student treats algorithmic output as authoritative without evaluation. This represents an abdication of metacognitive responsibility. Benson (2011) defines autonomous learning as conscious, intentional decision-making about one's own learning. However, this uncritical acceptance is the opposite: passive, delegated decision-making.

Research on LLM use in writing shows this as a consistent pattern. Ziqi et al. (2024) found that students almost always accept LLM-driven feedback on grammar and coherence without critical assessment. They found that students *do* discriminate (accepting grammar feedback but rejecting content feedback), but this discrimination is not based on reasoned evaluation; it is based on perceived authority of the system in different domains.

**Teacher Action :**

1. Have students show you their AI-generated drafts and their final versions side-by-side
2. Compare them: "What suggestions from AI did you accept? Which ones did you reject?"
3. For accepted suggestions, ask: "Why did you decide to use this suggestion?"
4. For rejected suggestions, ask: "Why did you decide NOT to use this suggestion?"
5. Track the ratio: What percentage of AI suggestions are accepted vs. rejected?
6. Create a protocol (see Supplementary Materials B, Strategy 2: Critical AI Literacy) that requires them to evaluate before accepting
7. Teach them that critical evaluation is a sign of strong writing, not distrust of AI

**Indicator 6: Equating Success with Algorithmic Metrics**

**Recognition:** Students treat system-generated scores or absence of error flags as the main indicator of writing quality, displacing audience understanding as the goal.

**Classroom Manifestation:**

They consider essays "finished" when Grammarly shows "100% correctness" or “no red flags”. They state: "It says I am done, so I am done." The algorithmic verdict becomes the final arbiter of quality. Some will not submit work until the system confirms it is "good."

They submit work primarily focused on eliminating red/yellow flags (formatting/grammar markers), not on communicating clearly to a reader. They report: "I just fixed all the things Grammarly highlighted" without checking if the message is clear.

When asked "Is your essay ready?", They respond: "Yes, the checker says it is good." Aa a result, they have delegated the quality judgment to an algorithm. They are no longer asking: "Is my meaning clear? Will my audience understand? Have I accomplished my communicative goal?" They are only asking: "Does the system approve?"

They prioritize meeting algorithmic standards over audience comprehension. Statements include: "My score is good, so my writing must be good" or "The AI says there are no errors, so I am finished."

Some of them track their "Grammarly score" or "correctness percentage" across assignments as a measure of improvement, rather than tracking comprehension, clarity, or audience engagement.

**What This Signals:**

The definition of "good writing" has been redefined as "what the algorithm approves," not "what communicates effectively to my audience." This represents an ideological shift in what students value and how they measure success.

Zhan and Yan (2025) demonstrate that writing success has been reinterpreted to rely on the lack of algorithmic warning signs rather than audience involvement or communicative effectiveness. Accordingly, Canale and Swain's (1980) multidimensional competence model is collapsed into a single dimension: grammatical/stylistic correctness as defined by an algorithm.

**Teacher Action :**

1. Separately evaluate algorithmic metrics vs. actual communicative effectiveness
2. Ask students: "Is your essay clear to someone reading it? How do you know?" (to emphasize reader understanding, not algorithmic approval)
3. Have peers provide feedback *before* students check with AI systems
4. Create a feedback protocol: Student feedback first **→** Reader comprehension first **→** Then algorithmic checking
5. Show them examples where algorithmic metrics and communicative clarity diverge
6. Emphasize: "Good writing means your reader understands your message. The algorithm is just one tool to help polish; it is not the ultimate goal."
7. **Internalization of AI Norms—Three Observable Patterns**

**Indicator 7: Homogenization of Voice and Style**

**Recognition:** Students' unique personal or culturally-influenced rhetorical voice is replaced by generic, AI-polished tone.

**Classroom Manifestation:**

Comparing student writing samples over time (early semester vs. current) reveals a striking shift. Early essays show personal voice, idioms, cultural references, distinctive personality. Recent essays sound generic, formal, standardized. The individual style has been erased.

Their writing becomes more similar to other peers' writing, a loss of individuality and distinction. A multileveled class of 25 learners now sounds like they are all written by the same hand (the algorithm's hand). Where there should be diversity of voices, there is homogeneity.

Loss of cultural markers occurs noticeably. A student from a multilingual background previously used code-switching ("I think, as we say in Spanish, when...") or cultural references ("Like my mom always says..."). Recent writing no longer contains these features. His cultural identity has been stripped from his written output.

Teacher observation captures this: "This does not sound like *[student name]*'s voice anymore." The teacher can no longer recognize his student's writing by its distinctive voice.

Early writing might include emotional language, personal anecdotes, or direct address to the reader. Recent writing is distant, formal, and impersonal, characteristic of AI output.

**What This Signals:**

Student's writing identity is being reshaped by algorithmic defaults. Individual voice is subordinated to machine-preferred patterns. He is losing his authorial identity.

Research on LLM effects documents this explicitly. Jakesch et al. (2023) show that learners inadvertently take on the rhetorical stance and style of the AI, modifying their own writing to fit the system's favored patterns." Critically, Agarwal et al. (2025) document that this homogenization often pushes writers toward Western stylistic conventions, erasing culturally specific expression. They term this "AI colonialism", the systematic displacement of non-Western varieties by algorithmic preference for Western, Global North norms.

Mi et al. (2025) document "erosion and homogenization of voice" as a critical concern in AI-mediated writing. Similarly, Tran and Stell (2024) show that LLMs tend to default to standard language forms, sidelining local varieties. Thus, students from multilingual backgrounds and non-Western linguistic communities are particularly affected.

**Teacher Action :**

1. Create a writing sample collection: early semester (before heavy AI use) and current (after AI use)
2. Compare them: Look for presence/absence of personal voice, cultural features, stylistic quirks, enthusiasm, individuality
3. Document the shift: Where did the voice go? What language disappeared ?
4. Share this with the student (non-judgmentally): "I notice your earlier writing had [specific feature]. I want to help you keep that while still improving your writing technically."
5. Implement voice preservation work (see Supplementary Materials B, Strategy 3: Voice Preservation)
6. Affirm: "Your voice including your way of writing, your cultural references, and your personality is valuable and should be protected."

**Indicator 8: Unreflective Imitation of AI Output**

**Recognition:** Students directly replicate AI's characteristic phrasing, metaphors, and text structures without adaptation to their own authorial identity.

**Classroom Manifestation :**

Students adopt AI phrases verbatim. Formulaic expressions appear consistently: "It is imperative that...", "In conclusion, it is evident that...", "One might argue that..." These are characteristic LLM phrases, recognizable to anyone familiar with AI output. Learners sound like an algorithm, rather than like a human writer.

Metaphors and examples appear suspiciously similar across essays. A metaphor or specific example appears in multiple students' work, which is a signature of LLM influence. When asked where the example came from, he says: "ChatGPT used that example, so I did too."

Identical sentence structures appear in multiple students' work: elaborate subordinate clauses, particular transitional patterns, specific rhythms. This pattern is visually striking when comparing their essays side-by-side.

The writing quality "jumps" unnaturally. A student who normally writes at an intermediate level suddenly produces sophisticated prose that doesn't match his spoken ability or earlier written work. When asked to explain their writing or discuss their ideas verbally, they cannot articulate the content at the sophistication level of his written work. This mismatch signals imitation rather than authentic composition.

A student's writing voice is "too polished," too professional, too formal for his proficiency level. The sophistication level exceeds what they can produce independently or explain verbally.

**What This Signals:**

The student is no longer composing in his authentic voice; they are imitating machine-generated text. They have not internalized the content deeply enough to express it in his own language. They are merely adopting the algorithm's language as his own.

Casal and Kessler (2023) show that LLM writing is nearly indistinguishable from human prose, which makes the influence of algorithmic language particularly hard to notice, and even harder to resist. Students themselves may not be consciously aware that they are imitating AI; the text sounds so natural, so sophisticated, so "correct," that they do not question it.

This represents the deepest level of internalization: the students’ writing identity has been replaced by algorithmic output, and they no longer distinguish between the two.

**Teacher Action :**

1. Listen to students speak about their essay topic, then read their written essay
2. Do they match? If written essay sounds much more sophisticated/formal/complex than they can explain verbally, AI influence is likely high
3. Have them explain their own writing in their own words: "Tell me about this paragraph in your own language"
4. Mismatches between written and spoken sophistication reveal imitation rather than authentic composition
5. Ask them to rewrite AI-generated sections in their own words
6. Have them create vocabulary lists of words/phrases they use authentically vs. what AI suggested
7. Explicitly discuss: "This phrase sounds like an algorithm, not like you. How would you say this in your own words?"

**Indicator 9: Perception of AI Norms as Neutral**

**Recognition:** Students fail to recognize the culturally and ideologically biased preferences of AI; instead view its outputs as objective, apolitical benchmarks of "good writing."

**Classroom Manifestation:**

Students assume AI feedback is universally correct and objective. They state: "The AI would not flag this if it were not wrong." They treat the algorithm as an authority on truth, not as a tool with limitations and biases.

They resist human feedback if it conflicts with AI: "But ChatGPT said this was the right way to write it." When a teacher suggests an alternative to what AI recommended, they trust the algorithm over the human expert. "The checker knows better than I do about English" or even better than the teacher knows.

They treat the algorithm as having authority over contextual judgment. They state: "There is only one correct way to write this, and the AI knows what it is." They in fact do not understand that writing is contextual, so different genres, audiences, and purposes call for different choices.

Students lack critical awareness that AI defaults to specific (Western, Global North, academic, formal) stylistic norms. When a multilingual learner's unique linguistic features are flagged as "errors" by AI, they assume that his features are genuinely wrong, not simply different from what the algorithm was trained on.

Statements reveal complete acceptance of AI as objective truth: "The system is fair; it treats all writing the same way" (not recognizing that treating all writing the same erases legitimate linguistic diversity).

**What This Signals:**

Student has internalized algorithmic preferences as objective truth; and lost sight of writing as contextual, rhetorical, purposeful negotiation. They no longer see writing choices as strategic decisions; but as objectively right or wrong.

Bender et al. (2021) explain that LLMs trained on unfiltered internet data end up reflecting dominant norms, stereotypes, and assumptions. Because these biases are often presented in a neutral, matter-of-fact manner, users can easily accept them as normal and authoritative without a second thought. The algorithm's output is presented as objective and neutral, that is why its biases are so insidious and hard to resist.

This is the ideological dimension of ADS: students no longer recognize that the algorithm encodes power relationships, cultural preferences, and linguistic hierarchies. They instead see it as a neutral arbiter of quality.

**Teacher Action:**

1. Explicitly teach that AI reflects the values of its training data (predominantly Western, academic, formal English)
2. Show examples of excellent, powerful writing that would "fail" AI checks:
   - Poetry with unconventional grammar
   - Informal persuasive writing
   - Code-switching for authentic cultural expression
   - Non-Western rhetorical patterns
3. Explain: "This writing is excellent even though AI would flag it. The AI does not know that different contexts need different choices."
4. Affirm that different contexts require different writing choices, and all are valid:
   - Academic writing can be formal OR conversational
   - Persuasive writing can use formal argument OR storytelling
   - Email to a professor is different from email to a friend
5. For multilingual or multilectal students: "Your way of writing is not wrong; it is different. Do not let an algorithm convince you otherwise."
6. Create a culture in the classroom: "We think critically about the tools we use. We do not accept them as objective truth."

**SUMMARY: Using These Indicators in Your Classroom**

These nine indicators can be used as an observational checklist. So, teachers might:

1. Monthly check-in: Review recent student writing and behavior. Do any of these nine patterns appear?
2. Individual face to face meetings: Ask about AI use. Listen for statements that match these indicators.
3. Writing samples: Compare early vs. recent work. Look for confidence erosion, voice homogenization, and increased algorithmic language.
4. Student interviews or surveys: Ask directly: "How do you feel about writing without AI?" "Why did you make this revision?" "How do you know if your writing is good?"
5. Early intervention: If you identify Indicators 1-3 (confidence erosion), implement Supplementary Materials B, Strategy 1 immediately.
6. Ongoing support: For students showing Indicators 4-6 (algorithmic approval bias), implement Strategy 2 (Critical AI Literacy).
7. Identity protection: For the ones showing Indicators 7-9 (AI norm internalization), implement Strategy 3 (Voice Preservation).

**Key principle**: These indicators are not diagnostic labels for students. They are observable patterns that signal a learner might benefit from targeted support. Early recognition and intervention prevent ADS from becoming entrenched.
